# Supplementary material for: Development of a phenotyping protocol for combined drought and salinity stress at seedling stage in rice
Source: Frontiers journal article supplement (doi:10.3389/fpls.2023.1173012), 2023-05-31
Supplement: Data_Sheet_1.pdf [file Data_Sheet_1.pdf]

## *Supplementary Material*

### **1 Supplementary Figures and Tables**

#### **1.1 Supplementary Tables**

**Supp. Table 1:** Details of treatments tested in different experiments of optimization of salinity and drought phenotyping. FC: field capacity, EC: electrical conductivity, MC: moisture content, DAS: days after seeding. After the initial addition of saline water, soil moisture levels were maintained with tap water.

##### **A. Testing different levels of individual salinity stress**

| Treatment No. | Treatment details                                                                                                                                    |
|---------------|------------------------------------------------------------------------------------------------------------------------------------------------------|
| T1            | Seeding of pre-germinated seeds at FC (field capacity), salinized EC4 dSm <sup>-1</sup> after seedling emergence and establishment, maintained at FC |
| T2            | Pre-germinated seeds seeding at FC, salinized EC8 dSm <sup>-1</sup> after seedling emergence and establishment, maintained at FC                     |
| T3            | Pre-germinated seeds seeding at FC, salinized EC10 dSm <sup>-1</sup> after seedling emergence and establishment, maintained at FC                    |
| T4            | Pre-germinated seeds seeding at FC, salinized EC12 dSm <sup>-1</sup> after seedling emergence and establishment, maintained at FC                    |

##### **B. Testing different orders of applying salinity and drought stress, with different levels of salinity but all soil moisture levels starting at field capacity**

|     |                                                                                                                                                                            |
|-----|----------------------------------------------------------------------------------------------------------------------------------------------------------------------------|
| T5  | Pre-germinated seeds seeding at FC, drought imposition after seedling emergence and establishment by no application of water for 15 days                                   |
| T6  | Pre-germinated seeds seeding at FC, drought first (for 15 days) then salinity (EC8 dSm <sup>-1</sup> at FC) at 30% of FC (for another 15 days)                             |
| T7  | Pre-germinated seeds seeding at FC, drought first (no application of water for 15 days) then salinized (EC 8 dSm <sup>-1</sup> ) at FC (for another 15 days at FC)         |
| T8  | Pre-germinated seeds seeding at FC, salinity first (EC4 dSm <sup>-1</sup> at FC for 15 days) after seedling emergence and establishment then drought (for another 15 days) |
| T9  | Pre-germinated seeds seeding at FC, salinization at seeding (EC4 dSm <sup>-1</sup> at FC) followed by drought (15 days)                                                    |
| T10 | Pre-germinated seeds seeding at FC, salinization (EC8 dSm <sup>-1</sup> at FC) after 4 DAS followed by drought (15 days)                                                   |
| T11 | Pre-germinated seeds seeding at FC, drought first (15 days) then salinity (EC 8 dSm <sup>-1</sup> ) at 25% of FC (15 days)                                                 |
| T12 | Pre-germinated seeds seeding at FC, salinization (EC10 dSm <sup>-1</sup> at FC) at seeding followed by no water application                                                |

##### **C. Testing treatments initiated at soil moisture levels below field capacity**

|     |                                                                                                                            |
|-----|----------------------------------------------------------------------------------------------------------------------------|
| T13 | Seeding at 75% of FC, salinization (EC10 dSm <sup>-1</sup> at FC) at seeding followed by no water application              |
| T14 | Seeding at 75% of FC followed by drought (no water application)                                                            |
| T15 | Seeding at 75% of FC, MC reduced to 30% of FC (moderate drought) then salinity (EC 10 dSm <sup>-1</sup> at FC) for 15 days |
| T16 | Control treatment: seeding at FC & maintained at FC                                                                        |

#### D. Testing treatments allowed to dry down to 30% of field capacity only

|     |                                                                                                                                                           |
|-----|-----------------------------------------------------------------------------------------------------------------------------------------------------------|
| T17 | Seeding at FC, salinized ( $EC\ 10\ dSm^{-1}$ at FC) after seedling emergence and establishment, MC reduced to 30% of FC, further MC maintained at 30% FC |
| T18 | Seeding at FC followed drought by no application of water until 30% of FC, further maintained at 30% of FC                                                |
| T19 | Seeding at FC followed drought until the end of experiment by no application of water                                                                     |
| T20 | Seeding at FC, moisture reduced to 30 % of FC (moderate drought), salinized at 30% FC with $EC10\ dSm^{-1}$ at FC), maintained at 30% FC                  |

#### E. Monitoring soil moisture evaporation in unplanted trays across different treatments

|     |                                                                                                                                    |
|-----|------------------------------------------------------------------------------------------------------------------------------------|
| T21 | Trays with soil at 100% FC (normal water) + no seeding                                                                             |
| T22 | Trays with soil salinized at $EC\ 10\ dSm^{-1}$ , maintained at 100% FC + no seeding                                               |
| T23 | Trays with soil at 100% FC, moisture reduced to 30% FC; maintained at 30% FC (drought at 30% FC)+ no seeding                       |
| T24 | Trays with soil at 100% FC at beginning, no water added until end of the experiment + no seeding                                   |
| T25 | Trays with soil at 100% FC, moisture reduced to 30% of FC; at 30% FC salinized $EC10\ dSm^{-1}$ ; maintained at 30% FC+ no seeding |

#### F. Comparing direct seeding with transplanting young seedlings

|     |                                                                                                                                                             |
|-----|-------------------------------------------------------------------------------------------------------------------------------------------------------------|
| T26 | Soil salinized with $EC10\ dSm^{-1}$ at FC; MC of trays reduced to 60%FC, direct seeding of dry seeds at 60%FC of previously salinized trays                |
| T27 | Soil salinized with $EC10\ dSm^{-1}$ at FC; MC of trays reduced to 60%FC, transplanted young seedlings (7 days old) at 60% FC of previously salinized trays |
| T28 | Unplanted trays with salinized soil at $EC10\ dSm^{-1}$ to monitor moisture evaporation                                                                     |

#### G. Finalizing the optimized seedling stage drought+ salinity protocol

|     |                                                                                                                                                                                |
|-----|--------------------------------------------------------------------------------------------------------------------------------------------------------------------------------|
| T29 | Transplanted 7 day old seedlings in soil salinized at MC of 75% FC ( $EC10\ dSm^{-1}$ at FC), further moisture level maintained at 75% of FC                                   |
| T30 | Transplanted 7 day old seedlings in soil at 75% FC moisture and allowed to experience drought until 30% of FC, maintained at 30% FC                                            |
| T31 | Transplanted 7 day old seedlings in soil salinized at MC of 75% FC ( $EC10\ dSm^{-1}$ at FC), further moisture level reduced to 30% FC by drying, and maintained at 30 % of FC |
| T32 | Transplanted 7 day old seedlings in soil at 75% FC moisture and maintained at 75% FC as control                                                                                |

**Supp Table 2:** SNAP Solution used for salinity screening of the backcross generations. SNAP A and B stocks were provided by the University of the Philippines Los Baños Institute of Plant Breeding.

| Stock |                                | Liters                                              |
|-------|--------------------------------|-----------------------------------------------------|
| 1     | SNAP A                         | 1% of total volume of water                         |
| 2     | SNAP B                         | 1% of total volume of water                         |
| 3     | FeSO <sub>4</sub> (made fresh) | 2.5 g/L; 1.25 ml of the solution per liter of water |

**Supp Table 3.** Standard Evaluation Scores for seedling stage salinity screening through solution culture method (as described in IRRI, 1996).

| SES | Observation                                                                             | Tolerance          |
|-----|-----------------------------------------------------------------------------------------|--------------------|
| 1   | Normal growth, only the old leaves show white tips while no symptoms on young leaves    | Very high          |
| 3   | Near normal growth, but only leaf tips burn, few older leaves become whitish partially  | High               |
| 5   | Growth severely retarded; most old leaves severely injured, few young leaves elongating | Moderate           |
| 7   | Complete cessation of growth; most leaves dried; only few young leaves still green      | Susceptible        |
| 9   | Almost all plants dead or dying                                                         | Highly Susceptible |

**Supp. Table 4.** Soil electrical conductivity (EC) levels in the Phytotron physiology, drought+salinity standardization (shown in Fig. 1), and intercross screening experiments. Values shown are the EC of the soil extract (ECe) in dS m<sup>-1</sup>.

| <b>Expt</b>                       | <b>Treatment No.<br/>(Supp. Table 3)</b> | <b>Treatment</b>                  | <b>Bulk soil</b> | <b>Top</b> | <b>Middle</b> | <b>Bottom</b> |
|-----------------------------------|------------------------------------------|-----------------------------------|------------------|------------|---------------|---------------|
| Oct 2017<br>Phytotron             | T16                                      | CONTROL                           | 4.7              |            |               |               |
|                                   | T5                                       | Drought                           | 7.1              |            |               |               |
|                                   | T12                                      | DROUGHT + SALINITY (EC 10)        | 15.9             |            |               |               |
|                                   | T13                                      | DROUGHT+ SALINITY (75% FC; EC 10) | 7.8              |            |               |               |
| Nov 2017<br>Phytotron             | T16                                      | CONTROL                           | 3.7              |            |               |               |
|                                   | T14                                      | D (75% FC)                        | 4.0              |            |               |               |
|                                   | T15                                      | D--> S (75% FC)                   | 6.5              |            |               |               |
|                                   | T3                                       | SALINITY (EC 10)                  | 4.4              |            |               |               |
| July 2018: D+S<br>standardization | T32                                      | Control                           |                  | 3.6        | 4.0           | 3.8           |
|                                   | T30                                      | Drought                           |                  | 4.0        | 4.2           | 3.8           |
|                                   | T31                                      | DROUGHT+ SALINITY (75% FC; EC 10) |                  | 17.6       | 14.4          | 14.9          |
|                                   | T29                                      | Salinized 75% FC                  |                  | 12.8       | 10.1          | 12.4          |
| Dec 2018: D+S<br>standardization  | T31                                      | DROUGHT+ SALINITY (75% FC; EC 10) |                  | 12.4       |               | 9.7           |
| Oct 2020: D+S<br>standardization  | T31                                      | DROUGHT+ SALINITY (75% FC; EC 10) |                  | 15.7       | 7.1           | 6.7           |

**Supp. Table 5.** Absolute values of shoot dry weight at seedling stage across treatments in the October 2017 Phytotron, November 2017 Phytotron, 2018 Field, and January 2019 Phytotron experiments. P values from ANOVA across treatments and for the genotype effect within each treatment are shown. Values shown are shoot dry weight in grams per plant for the phytotron experiments and grams per 2 hills for the field experiment.

| <b>October 2017 Phytotron</b> |         |   |         |  |                            |                                   |
|-------------------------------|---------|---|---------|--|----------------------------|-----------------------------------|
| Treatment                     | <0.001  |   |         |  |                            |                                   |
| Genotype                      | <0.001  |   |         |  |                            |                                   |
| Trt x Gen                     | 0.541   |   |         |  |                            |                                   |
|                               | Control |   | Drought |  | DROUGHT + SALINITY (EC 10) | DROUGHT+ SALINITY (75% FC, EC 10) |
| CSR28                         | 0.138   | a | 0.091   |  | 0.057 ab                   | 0.097 a                           |
| FL478                         | 0.138   | a | 0.100   |  | 0.074 a                    | 0.078 b                           |
| IR29                          | 0.074   | b | 0.061   |  | 0.050 b                    | 0.064 bc                          |
| IRRI 141                      | 0.089   | b | 0.068   |  | 0.041 b                    | 0.064 bc                          |
| IRRI 154                      | 0.095   | b | 0.069   |  | 0.037 b                    | 0.073 bc                          |
| OM4900                        | 0.088   | b | 0.068   |  | 0.044 b                    | 0.080 ab                          |
| Sahbhagi dhan                 | 0.079   | b | 0.059   |  | 0.042 b                    | 0.059 c                           |
| Sukha dhan 6                  | 0.085   | b | 0.069   |  | 0.042 b                    | 0.070 bc                          |
| Gen                           | 0.01    |   | 0.116   |  | 0.0158                     | 0.007                             |

---

| <b>November 2017 Phytotron</b> |         |   |            |    |                 |                  |
|--------------------------------|---------|---|------------|----|-----------------|------------------|
| Treatment                      | <0.001  |   |            |    |                 |                  |
| Genotype                       | <0.001  |   |            |    |                 |                  |
| Trt x Gen                      | 0.223   |   |            |    |                 |                  |
|                                | CONTROL |   | D (75% FC) |    | D--> S (75% FC) | SALINITY (EC 10) |
| CSR28                          | 0.169   | a | 0.058      | ab | 0.076           | 0.061            |
| FL478                          | 0.157   | a | 0.064      | a  | 0.114           | 0.059            |
| IR29                           | 0.100   | b | 0.049      | bc | 0.073           | 0.034            |
| IRRI 141                       | 0.098   | b | 0.043      | c  | 0.059           | 0.039            |
| IRRI 154                       | 0.088   | b | 0.036      | c  | 0.053           | 0.032            |
| OM4900                         | 0.103   | b | 0.045      | bc | 0.077           | 0.048            |
| Sahbhagi dhan                  | 0.099   | b | 0.039      | c  | 0.069           | 0.034            |
| Sukha dhan 6                   | 0.092   | b | 0.036      | c  | 0.067           | 0.032            |
| Gen                            | 0.002   |   | 0.004      |    | 0.078           | 0.130            |

| <b>Field 2018DS</b> |        |       |      |  |
|---------------------|--------|-------|------|--|
| Treatment           | <0.001 |       |      |  |
| Genotype            | 0.85   |       |      |  |
| Trt x Gen           | 0.887  |       |      |  |
|                     | WW     | SS    | RF   |  |
| CSR 28              | 13.11  | 6.07  | 6.24 |  |
| FL 478              | 12.78  | 10.26 | 7.78 |  |
| IR 29               | 11.94  | 5.63  | 6.22 |  |
| IRRI 141            | 13.05  | 6.91  | 5.36 |  |
| IRRI 154            | 10.19  | 9.94  | 6.55 |  |
| OM 4900             | 12.72  | 9.55  | 5.24 |  |
| Sahbhagi Dhan       | 10.64  | 10.16 | 5.74 |  |
| Sukha dhan 6        | 15.77  | 8.03  | 7.11 |  |
| Gen                 | 0.41   | 0.85  | 0.97 |  |

| <b>January 2019 Phytotron</b> |         |     |         |                    |     |                  |
|-------------------------------|---------|-----|---------|--------------------|-----|------------------|
| Treatment                     | <0.001  |     |         |                    |     |                  |
| Genotype                      | <0.001  |     |         |                    |     |                  |
| Trt x Gen                     | 0.956   |     |         |                    |     |                  |
|                               | CONTROL |     | DROUGHT | Drought + Salinity |     | SALINIZED 75% FC |
| CSR28                         | 0.182   | a   | 0.123   | 0.069              | a   | 0.082            |
| FL478                         | 0.173   | ab  | 0.107   | 0.056              | ab  | 0.082            |
| IR29                          | 0.110   | d   | 0.075   | 0.023              | d   | 0.025            |
| IRRI 141                      | 0.134   | bcd | 0.092   | 0.043              | bc  | 0.048            |
| IRRI154                       | 0.153   | abc | 0.100   | 0.039              | bcd | 0.083            |
| OM4900                        | 0.112   | cd  | 0.087   | 0.033              | cd  | 0.043            |
| Sahbhagi Dhan                 | 0.133   | bcd | 0.096   | 0.033              | cd  | 0.048            |
| Sukha dhan 6                  | 0.129   | cd  | 0.085   | 0.033              | cd  | 0.057            |
| Gen                           | 0.012   |     | 0.268   | 0.003              |     | 0.090            |

**Supp. Table 6.** Absolute values of the quantum yield of photosystem II (PhiPSII:  $[F_m' - F_i]/F_m'$ ), across treatments in the October 2017 Phytotron, November 2017 Phytotron, and 2018 Field experiments. P values from ANOVA across treatments and for the genotype effect within each treatment are shown. Values shown are shoot dry weight in grams per plant for the phytotron experiments and grams per 2 hills for the field experiment.

| <b>October 2017 Phytotron</b>  |         |            |                               |                                         |
|--------------------------------|---------|------------|-------------------------------|-----------------------------------------|
| Treatment                      | 0.0472  |            |                               |                                         |
| Genotype                       | 0.0208  |            |                               |                                         |
| Trt x Gen                      | 0.9616  |            |                               |                                         |
|                                | CONTROL | Drought    | DROUGHT +<br>SALINITY (EC 10) | DROUGHT+<br>SALINITY (75% FC,<br>EC 10) |
| CSR28                          | 0.175   | 0.150      | 0.192                         | 0.167                                   |
| FL478                          | 0.171   | 0.126      | 0.180                         | 0.146                                   |
| IR29                           | 0.129   | 0.139      | 0.174                         | 0.147                                   |
| IRRI 141                       | 0.150   | 0.121      | 0.140                         | 0.130                                   |
| IRRI 154                       | 0.154   | 0.143      | 0.141                         | 0.150                                   |
| OM4900                         | 0.141   | 0.137      | 0.151                         | 0.104                                   |
| Sahbhagi dhan                  | 0.107   | 0.109      | 0.132                         | 0.129                                   |
| Sukha dhan 6                   | 0.101   | 0.119      | 0.166                         | 0.117                                   |
| Gen                            | 0.411   | 0.662      | 0.506                         | 0.295                                   |
| <b>November 2017 Phytotron</b> |         |            |                               |                                         |
| Treatment                      | 0.00515 |            |                               |                                         |
| Genotype                       | 0.426   |            |                               |                                         |
| Trt x Gen                      | 0.998   |            |                               |                                         |
|                                | CONTROL | D (75% FC) | D--> S (75% FC)               | SALINITY (EC 10)                        |
| CSR28                          | 0.357   | 0.293      | 0.313                         | 0.277                                   |
| FL478                          | 0.344   | 0.264      | 0.359                         | 0.288                                   |
| IR29                           | 0.362   | 0.275      | 0.314                         | 0.219                                   |
| IRRI 141                       | 0.304   | 0.256      | 0.291                         | 0.259                                   |
| IRRI 154                       | 0.318   | 0.300      | 0.227                         | 0.242                                   |
| OM4900                         | 0.367   | 0.290      | 0.371                         | 0.300                                   |
| Sahbhagi dhan                  | 0.295   | 0.247      | 0.293                         | 0.223                                   |
| Sukha dhan 6                   | 0.332   | 0.283      | 0.267                         | 0.237                                   |
| Gen                            | 0.730   | 0.979      | 0.373                         | 0.964                                   |

---

|                            |        |       |       |
|----------------------------|--------|-------|-------|
| <b>Field 2018DS 45 DAS</b> |        |       |       |
| Treatment                  | <0.001 |       |       |
| Genotype                   | 0.998  |       |       |
| Trt x Gen                  | 0.999  |       |       |
|                            | WW     | SS    | RF    |
| CSR 28                     | 0.449  | 0.350 | 0.320 |
| FL 478                     | 0.436  | 0.393 | 0.327 |
| IR 29                      | 0.441  | 0.380 | 0.311 |
| IRRI 141                   | 0.436  | 0.360 | 0.319 |
| IRRI 154                   | 0.447  | 0.394 | 0.306 |
| OM 4900                    | 0.452  | 0.382 | 0.300 |
| Sahbhagi dhan              | 0.455  | 0.365 | 0.281 |
| Sukha dhan 6               | 0.405  | 0.375 | 0.315 |
| Gen                        | 0.456  | 0.992 | 0.999 |

---



---

|                             |          |       |    |       |     |
|-----------------------------|----------|-------|----|-------|-----|
| <b>Field 2018DS 111 DAS</b> |          |       |    |       |     |
| Treatment                   | <0.001   |       |    |       |     |
| Genotype                    | <0.001   |       |    |       |     |
| Trt x Gen                   | 0.013797 |       |    |       |     |
|                             | WW       | SS    |    | RF    |     |
| CSR 28                      | 0.301    | 0.327 | ab | 0.330 | ab  |
| FL 478                      | 0.289    | 0.186 | cd | 0.297 | abc |
| IR 29                       | 0.256    | 0.368 | a  | 0.292 | bc  |
| IRRI 141                    | 0.211    | 0.236 | bc | 0.286 | bc  |
| IRRI 154                    | 0.325    | 0.254 | bc | 0.358 | ab  |
| OM 4900                     | 0.296    | 0.231 | bc | 0.382 | a   |
| Sahbhagi dhan               | 0.279    | 0.128 | d  | 0.276 | bc  |
| Sukha dhan 6                | 0.249    | 0.193 | cd | 0.228 | c   |
| Gen                         | 0.396    | 0.001 |    | 0.040 |     |

---



**Supp. Table 7.** Correlations among physiological traits measured in the Phytotron experiments in A) October 2017 at 20 DAS, B) November 2017 at 18 DAS, C) July 2018 at 11 DAT, and C) in the 2018 dry season field trial at 45 and 101 DAS. \*: p<0.05, \*\*: p<0.01, \*\*\*:p<0.001. Treatments shown (as indicated by their treatment number) are described in Supp. Table 1.

PhiPSII: efficiency of Photosystem II, CCI: chlorophyll concentration index, SDW: shoot dry weight, gs: stomatal conductance, CT: canopy temperature, HI: harvest index, DTF: days to 50% flowering, GY: grain yield, % red: percent reduction in the stress treatment compared to the well-watered control treatment, DAS: days after sowing.

All % reduction values were calculated as  $\frac{\bar{x}_{\text{control}} - \bar{x}_{\text{stress}}}{\bar{x}_{\text{control}}} \times 100$ , and % increase values were calculated as  $\frac{\bar{x}_{\text{stress}} - \bar{x}_{\text{control}}}{\bar{x}_{\text{control}}} \times 100$ .

A) Phytotron Oct 2017

|                                                | CCI   | SDW   | PhiPSII<br>%red | CCI% red | SDW% red |
|------------------------------------------------|-------|-------|-----------------|----------|----------|
| <b>Drought (T5)</b>                            |       |       |                 |          |          |
| PhiPSII                                        | 0.5   | 0.17  | -0.69***        | -0.44*   | -0.06    |
| CCI                                            |       | 0.17  | -0.26           | -0.95*** | -0.02    |
| SDW                                            |       |       | 0.15            | -0.09    | -0.62*** |
| PhiPSII % red                                  |       |       |                 | 0.23     | 0.22     |
| CCI % red                                      |       |       |                 |          | 0.04     |
| <b>DROUGHT + SALINITY (EC 10) (T12)</b>        |       |       |                 |          |          |
| PhiPSII                                        | 0.26  | 0.22  | -0.76***        | -0.22    | -0.01    |
| CCI                                            |       | 0.23  | -0.17           | -0.96*** | -0.23    |
| SDW                                            |       |       | 0.05            | -0.22    | -0.67*** |
| PhiPSII % red                                  |       |       |                 | 0.1      | 0.12     |
| CCI % red                                      |       |       |                 |          | 0.27     |
| <b>DROUGHT+ SALINITY (75% FC, EC 10) (T13)</b> |       |       |                 |          |          |
| PhiPSII                                        | -0.15 | -0.06 | -0.71***        | 0.19     | 0.37*    |
| CCI                                            |       | 0.07  | 0.11            | -0.92*** | -0.2     |
| SDW                                            |       |       | 0.4*            | 0.03     | -0.43*   |
| PhiPSII % red                                  |       |       |                 | -0.21    | -0.12    |
| CCI % red                                      |       |       |                 |          | 0.17     |

B) Phytotron Nov 2017

|                                 | CCI  | SDW     | PhiPSII<br>%red | CCI% red | SDW%<br>red | SES     |
|---------------------------------|------|---------|-----------------|----------|-------------|---------|
| <b>SALINITY (EC 10) (T3)</b>    |      |         |                 |          |             |         |
| PhiPSII                         | 0.19 | 0.53**  | -0.98***        | -0.24    | -0.56***    | -0.4*   |
| CCI                             |      | -0.14   | -0.22           | -0.89*** | 0.02        | 0.22    |
|                                 |      |         |                 |          |             | -       |
| SDW                             |      |         | -0.46**         | 0        | -0.8***     | 0.62*** |
| PhiPSII %                       |      |         |                 |          |             |         |
| red                             |      |         |                 | 0.21     | 0.54**      | 0.33    |
| CCI % red                       |      |         |                 |          | 0.04        | -0.08   |
| SDW % red                       |      |         |                 |          |             | 0.33    |
| <b>D--&gt; S (75% FC) (T15)</b> |      |         |                 |          |             |         |
| PhiPSII                         | 0.27 | 0.64*** | -0.96***        | -0.3     | -0.48**     | -0.27   |
| CCI                             |      | 0.46*   | -0.25           | -0.94*** | -0.17       | -0.22   |
| SDW                             |      |         | -0.59***        | -0.44*   | -0.75***    | -0.42*  |
| PhiPSII %                       |      |         |                 |          |             |         |
| red                             |      |         |                 | 0.22     | 0.51**      | 0.24    |
| CCI % red                       |      |         |                 |          | 0.06        | 0.29    |
| SDW % red                       |      |         |                 |          |             | 0.16    |
| <b>D (75% FC) (T14)</b>         |      |         |                 |          |             |         |
| PhiPSII                         | 0.12 | 0.25    | -0.96***        | -0.19    | -0.37*      | 0.13    |
| CCI                             |      | 0.01    | -0.18           | -0.82*** | -0.04       | 0.03    |
| SDW                             |      |         | -0.14           | -0.2     | -0.5**      | -0.08   |
| PhiPSII %                       |      |         |                 |          |             |         |
| red                             |      |         |                 | 0.12     | 0.37*       | -0.17   |
| CCI % red                       |      |         |                 |          | -0.04       | -0.09   |
| SDW % red                       |      |         |                 |          |             | -0.13   |

C) Phytotron July 2018

**DROUGHT (T30)**

|                                      | SDW    | Na <sup>+</sup> | K <sup>+</sup> | Na <sup>+</sup> :K <sup>+</sup> | SES | SDW %red | Na <sup>+</sup> %inc | K <sup>+</sup> % inc |
|--------------------------------------|--------|-----------------|----------------|---------------------------------|-----|----------|----------------------|----------------------|
| Na <sup>+</sup>                      | -0.02  |                 |                |                                 |     |          |                      |                      |
| K <sup>+</sup>                       | -0.19  | -0.32           |                |                                 |     |          |                      |                      |
| Na <sup>+</sup> :K <sup>+</sup>      | -0.01  | 0.97***         | -0.53*         |                                 |     |          |                      |                      |
| SES                                  | -      | -               | -              | -                               |     |          |                      |                      |
| SDW %red                             | -0.56* | -0.05           | 0.42           | -0.12                           | -   |          |                      |                      |
| Na <sup>+</sup> %inc                 | 0      | 0.92***         | -0.04          | 0.82***                         | -   | -0.06    |                      |                      |
| K <sup>+</sup> % inc                 | -0.58* | -0.09           | 0.77***        | -0.25                           | -   | 0.44     | 0.14                 |                      |
| Na <sup>+</sup> :K <sup>+</sup> %inc | 0.23   | 0.93***         | -0.31          | 0.89***                         | -   | -0.2     | 0.93***              | -0.21                |

**SALINIZED 75% FC (T29)**

|                                      |          |         |          |         |       |       |         |         |
|--------------------------------------|----------|---------|----------|---------|-------|-------|---------|---------|
| Na <sup>+</sup>                      | -0.58*   |         |          |         |       |       |         |         |
| K <sup>+</sup>                       |          | -       |          |         |       |       |         |         |
|                                      | 0.31     | 0.76*** |          |         |       |       |         |         |
| Na <sup>+</sup> :K <sup>+</sup>      | -0.52*   | 0.99*** | -0.79*** |         |       |       |         |         |
| SES                                  | -0.46    | 0.54*   | -0.58*   | 0.52*   |       |       |         |         |
| SDW %red                             | -0.94*** | 0.52*   | -0.19    | 0.47*   | 0.3   |       |         |         |
| Na <sup>+</sup> %inc                 | -0.58*   | 0.98*** | -0.77*** | 0.96*** | 0.53* | 0.51* |         |         |
| K <sup>+</sup> % inc                 | 0.09     | -0.57*  | 0.89***  | -0.62** | -0.31 | -0.01 | -0.58*  |         |
| Na <sup>+</sup> :K <sup>+</sup> %inc | -0.51*   | 0.98*** | -0.82*** | 0.98*** | 0.5*  | 0.44  | 0.98*** | -0.68** |

**DROUGHT+ SALINITY (75% FC, EC 10) (T31)**

|                                      |          |         |          |          |        |       |        |          |
|--------------------------------------|----------|---------|----------|----------|--------|-------|--------|----------|
| Na <sup>+</sup>                      | -0.38    |         |          |          |        |       |        |          |
| K <sup>+</sup>                       |          | -       |          |          |        |       |        |          |
|                                      | 0.33     | 0.72*** |          |          |        |       |        |          |
| Na <sup>+</sup> :K <sup>+</sup>      | -0.5*    | 0.9***  | -0.89*** |          |        |       |        |          |
| SES                                  | -0.79*** | 0.25    | -0.02    | 0.31     |        |       |        |          |
| SDW %red                             | -0.92*** | 0.43    | -0.48*   | 0.61**   | 0.64** |       |        |          |
| Na <sup>+</sup> %inc                 | -0.27    | 0.89*** | -0.47*   | 0.69**   | 0.22   | 0.27  |        |          |
| K <sup>+</sup> % inc                 | 0.03     | -0.64** | 0.92***  | -0.76*** | 0.29   | -0.19 | -0.42  |          |
| Na <sup>+</sup> :K <sup>+</sup> %inc | -0.36    | 0.94*** | -0.78*** | 0.9***   | 0.16   | 0.44  | 0.9*** | -0.71*** |

D) 2018 dry season field, seedling/early vegetative stage drought stress

|                       | SDW 45 DAS | GY       |
|-----------------------|------------|----------|
| SDW 45 DAS            |            | 0.51**   |
| PhiPSII 45 DAS        | 0.63***    | 0.4*     |
| PhiPSII 111 DAS       | -0.38*     | -0.44*   |
| CCI 45 DAS            | 0.64***    | 0.25     |
| CCI 111 DAS           | 0.36*      | 0.26     |
| gs 111 DAS            | 0.41*      | 0.26     |
| CT 111 DAS            | 0.16       | -0.18    |
| Biomass at harvest    | 0.36*      | 0.58***  |
| HI                    | 0.42*      | 0.91***  |
| DTF                   | -0.27      | -0.62*** |
| GY % red              | -0.54**    | -0.91*** |
| SDW 45 DAS % red      | -0.96***   | -0.62*** |
| PhiPSII 45 DAS % red  | -0.6***    | -0.44*   |
| PhiPSII 111 DAS % red | 0.41*      | 0.44*    |
| CCI 45 DAS % red      | -0.61***   | -0.36*   |
| CCI 111 DAS % red     | -0.51**    | -0.46**  |
| gs 111 DAS % red      | -0.32      | -0.09    |

## 1.2 Supplementary Figures

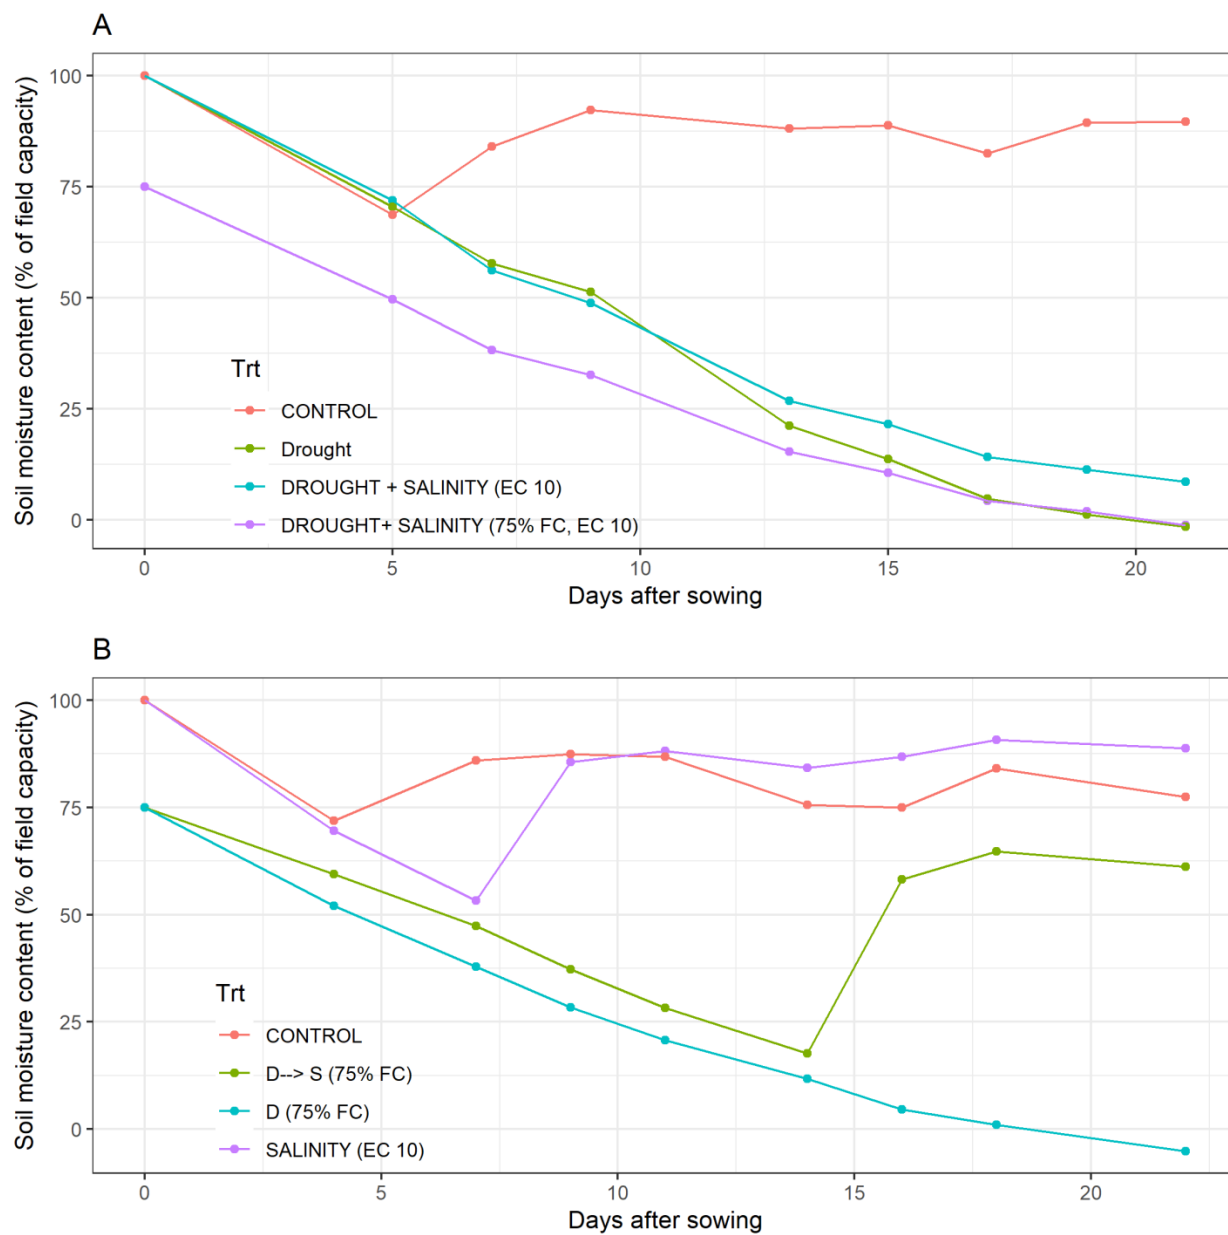

**Supplementary Figure 1.** Soil moisture levels in the Phytotron physiology experiments as a % of field capacity. A) the October 2017 experiment (T5, T12, T13, T16; see Supp. Table 1), and B) the November 2017 experiment (T3, T14, T15, T16; see Supp. Table 1).

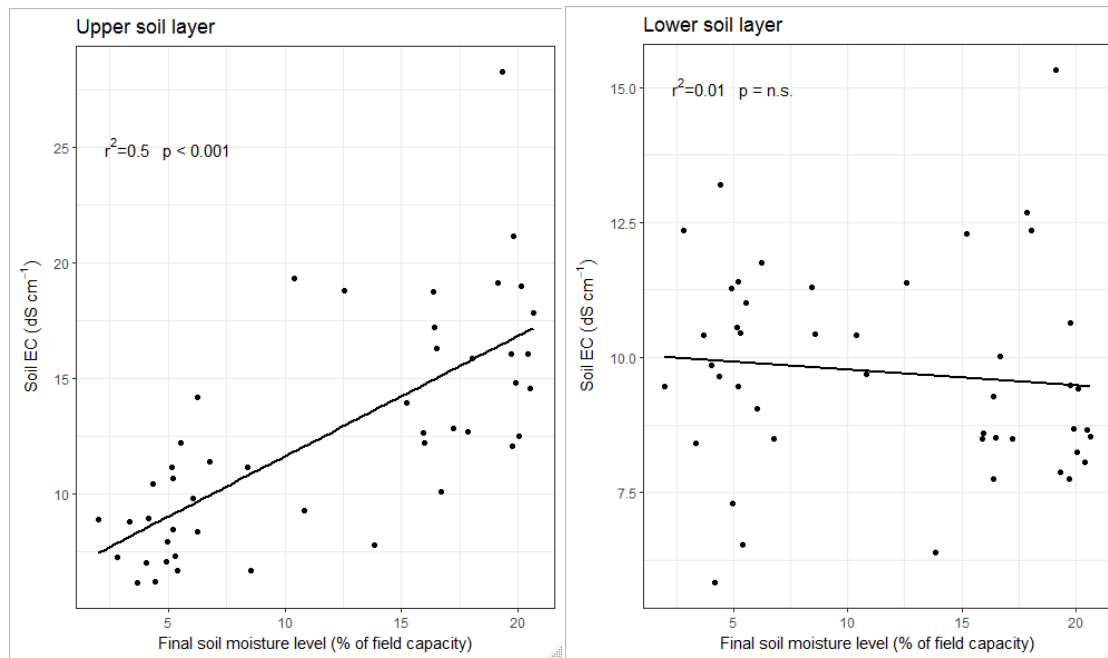

**Supplementary Figure 2.** Relationship between soil moisture levels and soil EC values at the end of the combined drought+ salinity stress (T31).

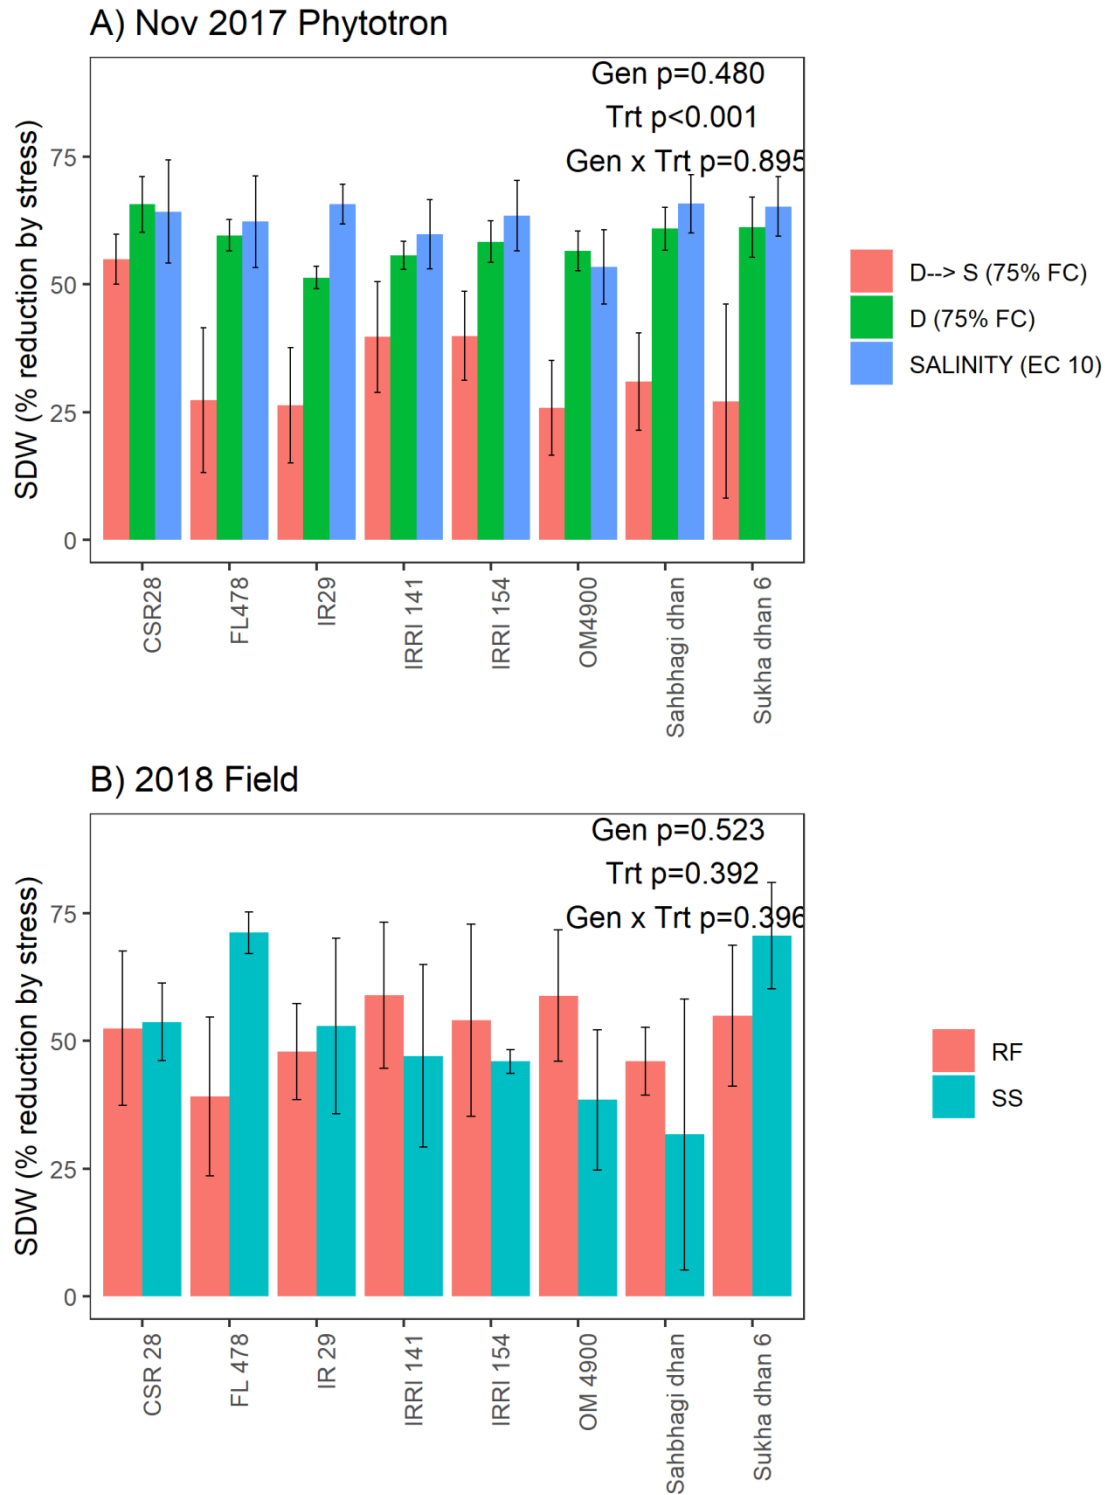

**Supplementary Figure 3.** Treatment and genotypic effects shoot dry weight reduction by stress in the A) Nov 2017 Phytotron (T3, T14, T15, T16; see Supp. Table 1), and B) 2018 dry season field experiments (RF: rainfed treatment, SS: drought treatment at seedling stage only). Genotype, treatment, and genotype x treatment effects based on ANOVA are indicated in each panel.

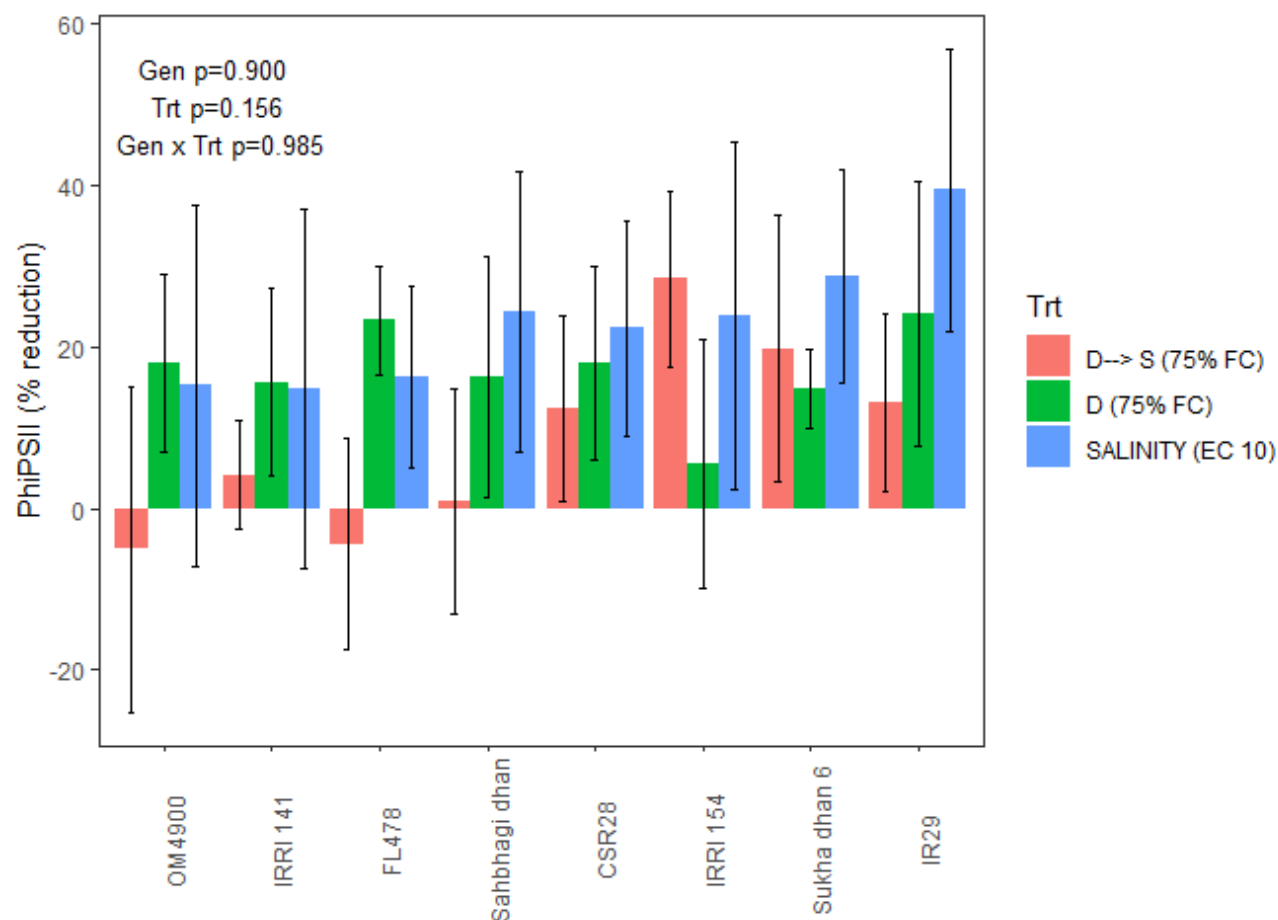

**Supplementary Figure 4.** Treatment and genotypic effects chlorophyll fluorescence (PhiPSII) reduction by stress in the Nov 2017 Phytotron (T3, T14, T15, T16; see Supp. Table 1) experiment. Genotype, treatment, and genotype x treatment effects based on ANOVA are indicated.
